# Supplementary material
Source: publisher site journal article supplement (https://e-cmh.org/upload/media/cmh-2023-0506-Supplementary-Figure-6.pdf)
Supplement: Supplementary file 1 [file cmh-2023-0506-Supplementary-Figure-6.pdf]

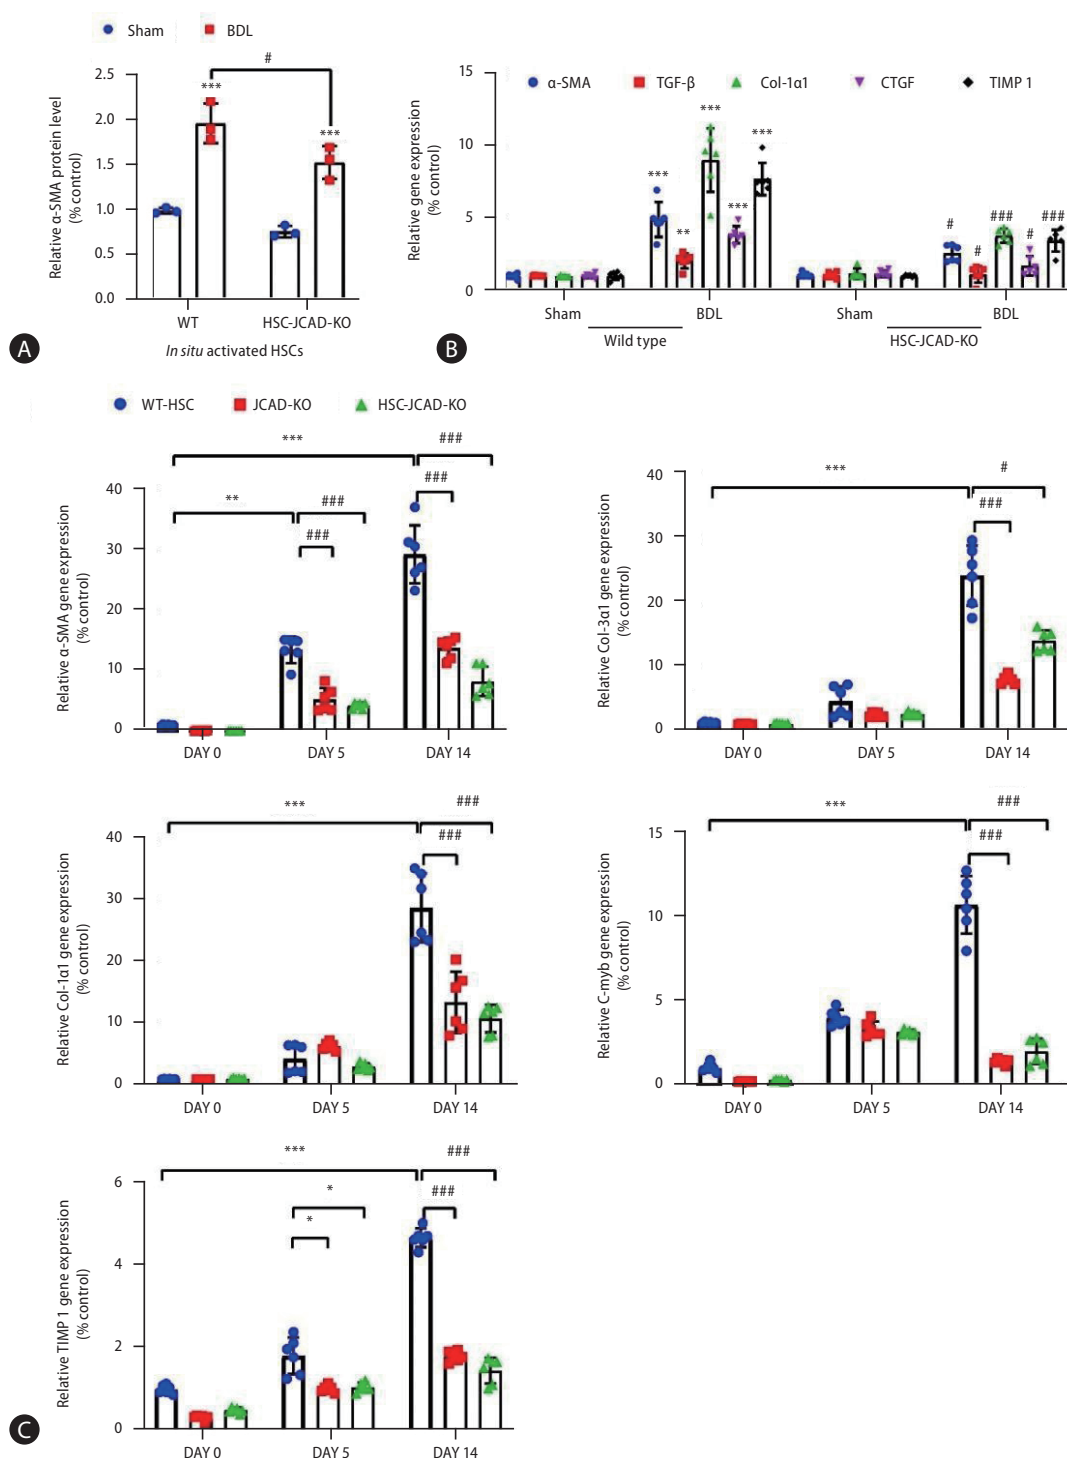

**Supplementary Figure 6.** Hepatic stellate cell-specific deletion of JCAD attenuated liver fibrosis in mice. (A) The semi-quantitative determination of  $\alpha$ -SMA protein expression.  $\beta$ -Actin was used as a loading control ( $n=3$ ). (B) Gene expression of WT and JCAD conditional knockout mouse (HSC-JCAD-KO) liver after BDL. (C) Primary HSCs were isolated from normal mice, JCAD-KO and HSC-JCAD-KO mice that underwent respectively 0, 5, and 14 days after BDL. mRNA levels were analyzed by quantitative RT-PCR analysis. HSCs from 3 livers were pooled to increase the yield and was seen as one *ex vivo* experiment, repeated 6 times ( $n=6$ ). All data were expressed as mean $\pm$ SD. \*\*\*\* $P<0.05$ , 0.01, and 0.001 compared to WT-Sham or primary HSC isolated from WT mice at day 0. ##### $P<0.05$ , 0.01, and 0.001 compared to WT-BDL or primary HSC isolated from WT mice at day 5 or 14.
